# Supplementary material for: IGF1 and Insulin Receptor Single Nucleotide Variants Associated with Response in HER2-Negative Breast Cancer Patients Treated with Neoadjuvant Chemotherapy with or without a Fasting Mimicking Diet (BOOG 2013-04 DIRECT Trial)
Source: MDPI journal article supplement (doi:10.3390/cancers15245872), 2023-12-17
Supplement: s1 [file s1]

# Supplementary Material

**Table S1.** Haploview

| IGF1R SNV       | Position | MAF  | Alternative SNV | r <sup>2</sup> | Genome position | MAF  |
|-----------------|----------|------|-----------------|----------------|-----------------|------|
| rs66745311      | 99503083 | 0.24 | rs1815009       | 0.92           | 99504671        | 0.24 |
| rs3051367       | 99503521 | 0.43 | rs2684788       | 0.94           | 99504437        | 0.42 |
| rs9282714       | 99503690 | 0.20 | rs2654980       | 1.00           | 99504843        | 0.20 |
| <b>INSR SNV</b> |          |      |                 |                |                 |      |
| rs2352955       | 7152404  | 0.22 | rs2252673       | 1.00           | 7150418         | 0.22 |
| rs34045095      | 7116136  | 0.24 | None            |                |                 |      |
| rs2352954       | 7152418  | 0.29 | None            |                |                 |      |

Haploview selection tagger table of SNVs that are in equilibrium with the 6 IGF1R and INSR SNVs that were technically not suitable for assay, showing tagging results with SNVs r<sup>2</sup> > 0.8

SNV = single nucleotide variant, INSR = insulin receptor gene, IGF1R = insulin like growth factor 1 receptor, MAF = mean allele frequency

**Table S2.** SNV information

| IGF1R 11 SNVs      |            | MAF   | Type of mutation       | Ref and Alt allele |     | Clinical variation PubMed |
|--------------------|------------|-------|------------------------|--------------------|-----|---------------------------|
| 1                  | rs3743258  | 0.303 | Intron                 | G                  | A   |                           |
| 2                  | rs3743259  | 0.308 | Intron                 | A                  | G   |                           |
| 3                  | rs2229765  | 0.419 | Missense               | G                  | A/T | Benign                    |
| 4                  | rs45484096 | 0.268 | Deletion, 3' prime UTR | CT                 | -   | Benign                    |
| 5                  | rs1815009  | 0.242 | 3' prime UTR           | C                  | T   | "                         |
| 6                  | rs2684788  | 0.424 | 3' prime UTR           | C                  | T   | "                         |
| 7                  | rs2654980  | 0.202 | 3' prime UTR           | C                  | T   | "                         |
| 8                  | rs2016347  | 0.439 | 3' prime UTR           | GAC                | T   | "                         |
| 9                  | rs2684787  | 0.212 | 3' prime UTR           | CA                 | T   | "                         |
| 10                 | rs2654981  | 0.419 | 3' prime UTR           | CT                 | G   | "                         |
| 11                 | rs3743249  | 0.242 | 3' prime UTR           | G                  | T   | "                         |
| <b>INSR 6 SNVs</b> |            |       |                        |                    |     |                           |
| 12                 | rs3745551  | 0.394 | 3' prime UTR           | C                  | T   | Benign                    |
| 13                 | rs3833238  | 0.222 | Indel, 3' prime UTR    | T                  | -   | Benign                    |
| 14                 | rs1051651  | 0.207 | 3' prime UTR           | G                  | C   | Benign                    |
| 15                 | rs1051690  | 0.242 | 3' prime UTR           | C                  | T   | Benign                    |
| 16                 | rs1799817  | 0.268 | Synonymous variant     | A                  | G   | Benign                    |
| 17                 | rs2252673  | 0.222 | Intron variant         | C                  | G   | Unknown                   |

SNV = single nucleotide variant, INSR = insulin receptor gene, IGF1R = insulin like growth factor 1 receptor, MAF = mean allele frequency, Ref = reference allele, Alt = alternative SNV allele, UTR = untranslated region, Indel = in frame deletion

**Table S3.** Proportional odds assumption

| <b>A IGF1R rs3743259 Odds Ratio</b> |                         |                 |                   |                 |                     |
|-------------------------------------|-------------------------|-----------------|-------------------|-----------------|---------------------|
| Miller & Payne score                |                         |                 |                   |                 |                     |
|                                     | grade 1<br>no reduction | grade 2<br><30% | grade 3<br>30-90% | grade 4<br>>90% | grade 5<br>no tumor |
| grade 1                             | Ref                     | 0.424           | 0.429             | 0.145           | 0.267               |
| grade 2                             | 2.361                   | Ref             | 1.014             | 0.342           | 0.631               |
| grade 3                             | 2.329                   | 0.986           | Ref               | 0.337           | 0.622               |
| grade 4                             | 6.907                   | 2.925           | 2.966             | Ref             | 1.846               |
| grade 5                             | 3.742                   | 1.585           | 1.607             | 0.542           | Ref                 |
| <b>B IGF1R rs3743258 Odds Ratio</b> |                         |                 |                   |                 |                     |
| Miller & Payne score                |                         |                 |                   |                 |                     |
|                                     | grade 1<br>no reduction | grade 2<br><30% | grade 3<br>30-90% | grade 4<br>>90% | grade 5<br>no tumor |
| grade 1                             | Ref                     | 0.386           | 0.373             | 0.125           | 0.265               |
| grade 2                             | 2.592                   | Ref             | 0.966             | 0.323           | 0.686               |
| grade 3                             | 2.684                   | 1.035           | Ref               | 0.335           | 0.71                |
| grade 4                             | 8.016                   | 3.093           | 2.987             | Ref             | 2.121               |
| grade 5                             | 3.78                    | 1.458           | 1.408             | 0.472           | Ref                 |

Odds ratios for IGF1R rs3743259 (**A**) and IGF1R rs3743258 (**B**)

**Table S4.** SNV information

| SNV              | No call | Call rate | MAF              |            | 1000Genomes    |        |       |          |
|------------------|---------|-----------|------------------|------------|----------------|--------|-------|----------|
|                  |         |           | Reference Allele | SNV Allele | MAF SNV Allele | PubMed | HWE   | P-value* |
| IGF1R rs2016347  | 0       | 100.0%    | 53%              | 47%        | 0.57           | 0.49   | 0.003 | 0.957    |
| IGF1R rs2229765  | 1       | 99.1%     | 58%              | 42%        | 0.42           | 0.45   | 1.116 | 0.291    |
| IGF1R rs1815009  | 0       | 100.0%    | 26%              | 74%        | 0.75           | 0.75   | 1.735 | 0.188    |
| INSR rs1051651   | 1       | 99.1%     | 82%              | 18%        | 0.21           | 0.18   | 2.447 | 0.118    |
| INSR rs3745551   | 1       | 99.1%     | 33%              | 67%        | 0.60           | 0.64   | 0.009 | 0.924    |
| IGF1R rs3743259  | 2       | 98.2%     | 71%              | 29%        | 0.31           | 0.29   | 1.297 | 0.255    |
| IGF1R rs2684787  | 1       | 99.1%     | 72%              | 28%        | 0.21           | 0.22   | 0.449 | 0.503    |
| IGF1R rs2654981  | 0       | 100.0%    | 46%              | 54%        | 0.42           | 0.39   | 0.053 | 0.818    |
| IGF1R rs2654980  | 0       | 100.0%    | 73%              | 27%        | 0.20           | 0.23   | 0.499 | 0.480    |
| IGF1R rs2684788  | 0       | 100.0%    | 48%              | 52%        | 0.42           | 0.46   | 0.072 | 0.788    |
| IGF1R rs3743249  | 0       | 100.0%    | 73%              | 27%        | 0.43           | 0.25   | 0.346 | 0.556    |
| IGF1R rs45484096 | 0       | 100.0%    | 65%              | 35%        | 0.27           | 0.31   | 1.118 | 0.290    |
| INSR rs3833238   | 0       | 100.0%    | 81%              | 19%        | 0.22           | 0.19   | 1.700 | 0.192    |
| INSR rs1051690   | 0       | 100.0%    | 15%              | 85%        | 0.76           | 0.84   | 0.095 | 0.757    |
| INSR rs1799817   | 0       | 100.0%    | 86%              | 14%        | 0.27           | 0.18   | 1.802 | 0.179    |
| INSR rs2252673   | 5       | 95.6%     | 13%              | 87%        | 0.78           | 0.81   | 0.760 | 0.383    |
| IGF1R rs3743258  | 9       | 92.0%     | 72%              | 28%        | 0.30           | 0.29   | 3.072 | 0.080    |

\*(if < 0.05 - not consistent with HWE); Call-rate minimum is set at 85%.

SNV single nucleotide variant, INSR insulin receptor, IGF1R insulin like growth factor 1 receptor, MAF mean allele frequency, HWE Hardy-Weinberg equation.

**Table S5.** Univariate model for covariates

| <b>A</b> | <b>Variable</b>   | <b>Miller &amp; Payne (n=114)</b> |                           |                      |              | <b>Radiological response (n=96)</b> |                           |                |      |
|----------|-------------------|-----------------------------------|---------------------------|----------------------|--------------|-------------------------------------|---------------------------|----------------|------|
|          |                   | <b>OR</b>                         | <b>95% CI lower-upper</b> | <b>p-value</b>       |              | <b>OR</b>                           | <b>95% CI lower-upper</b> | <b>p-value</b> |      |
|          | Age               | 1.00                              | 0.96                      | 1.04                 | 0.87         | 1.04                                | 0.98                      | 1.09           | 0.20 |
|          | BMI               | 0.98                              | 0.91                      | 1.05                 | 0.54         | 1.05                                | 0.96                      | 1.15           | 0.31 |
|          | Tumor status      | 2.22                              | 1.21                      | 4.07                 | <b>0.01</b>  | 0.58                                | 0.27                      | 1.24           | 0.16 |
|          | Lymph node status | 0.44                              | 0.26                      | 0.75                 | <b>0.003</b> | 1.06                                | 0.57                      | 1.98           | 0.86 |
|          | Other             | 0.06                              | 0.00                      | 0.75                 | <b>0.03</b>  | 1.63                                | 0.13                      | 19.77          | 0.70 |
|          | Lobular           | 0.46                              | 0.18                      | 1.16                 | 0.10         | 1.22                                | 0.37                      | 4.06           | 0.75 |
|          | Ductal/Carcinoma  | 2.72                              | Ref                       |                      |              | 2.72                                | Ref                       |                |      |
|          | ER-/PR-           | 0.52                              | 0.18                      | 1.49                 | 0.22         | 0.93                                | 0.25                      | 3.40           | 0.91 |
|          | ER+/PR-           | 0.77                              | 0.24                      | 2.45                 | 0.65         | 1.75                                | 0.45                      | 6.77           | 0.42 |
|          | ER+/PR+           | 2.72                              | Ref                       |                      |              | 2.72                                | Ref                       |                |      |
|          | FMD               | 0.96                              | 0.48                      | 1.92                 | 0.92         | 0.71                                | 0.29                      | 1.73           | 0.46 |
|          | Regular diet      | 2.72                              | Ref                       |                      |              | 2.72                                | Ref                       |                |      |
| <b>B</b> | <b>Variable</b>   | <b>Miller &amp; Payne (n=74)</b>  |                           |                      |              | <b>Radiological response (n=65)</b> |                           |                |      |
|          |                   | <b>OR</b>                         | <b>95% CI lower-upper</b> | <b>p-value</b>       |              | <b>OR</b>                           | <b>95% CI lower-upper</b> | <b>p-value</b> |      |
|          | Age               | 1.02                              | 0.96                      | 1.08                 | 0.56         | 1.02                                | 0.96                      | 1.09           | 0.53 |
|          | BMI               | 1.00                              | 0.91                      | 1.11                 | 0.95         | 1.05                                | 0.93                      | 1.18           | 0.45 |
|          | Tumor status      | 0.48                              | 0.23                      | 0.99                 | <b>0.05</b>  | 0.59                                | 0.25                      | 1.39           | 0.23 |
|          | Lymph node status | 1.87                              | 0.98                      | 3.56                 | 0.06         | 1.34                                | 0.66                      | 2.71           | 0.41 |
|          | Other             | 1.74*10 <sup>9</sup>              | 1.74*10 <sup>9</sup>      | 1.74*10 <sup>9</sup> |              |                                     |                           |                |      |
|          | Lobular           | 2.23                              | 0.76                      | 6.57                 | 0.14         | 1.30                                | 0.37                      | 4.57           | 0.68 |
|          | Ductal/Carcinoma  | 2.72                              | Ref                       | Ref                  |              | 2.72                                | Ref                       | Ref            |      |
|          | ER-/PR-           | 2.61                              | 0.46                      | 14.92                | 0.28         | 0.38                                | 0.04                      | 3.16           | 0.37 |
|          | ER+/PR-           | 0.88                              | 0.22                      | 3.60                 | 0.86         | 1.12                                | 0.22                      | 5.70           | 0.89 |
|          | ER+/PR+           | 2.72                              | Ref                       | Ref                  |              | 2.72                                | Ref                       | Ref            |      |
|          | FMD compliant     | 0.51                              | 0.19                      | 1.39                 | 0.19         | 0.47                                | 0.15                      | 1.49           | 0.20 |
|          | Regular diet      | 2.72                              | Ref                       | Ref                  |              | 2.72                                | Ref                       | Ref            |      |

**A** ITT univariate model for covariates. **B** PP univariate model for covariates

ITT intention-to-treat, PP per protocol, FMD fasting mimicking diet, OR odds ratio, CI confidence interval, BMI body mass index (kg/m<sup>2</sup>), HR-status hormone receptor status, ER estrogen receptor, PR progesterone receptor

**Table S6.** Logistic regression models responders versus non-responders

| A | ITT              | Miller & Payne 1-3 vs 4-5 |                    |   |         | Radiological response CR/PR vs SD/PD |                    |      |         |                      |       |
|---|------------------|---------------------------|--------------------|---|---------|--------------------------------------|--------------------|------|---------|----------------------|-------|
|   | SNVs             | OR                        | 95% CI lower-upper |   | p-value | OR                                   | 95% CI lower-upper |      | p-value |                      |       |
|   | IGF1R rs2016347  | 1.37                      | 2.03               | - | 13.91   | 0.35                                 | 0.63               | 1.31 | -       | 4.29                 | 0.28  |
|   | IGF1R rs2229765  | 1.14                      | 1.75               | - | 10.06   | 0.72                                 | 0.98               | 1.52 | -       | 9.69                 | 0.96  |
|   | IGF1R rs1815009  | 1.39                      | 1.80               | - | 27.05   | 0.45                                 | 1.11               | 1.54 | -       | 16.74                | 0.83  |
|   | INSR rs1051651   | 1.31                      | 1.83               | - | 17.22   | 0.49                                 | 1.87               | 2.13 | -       | 99.88                | 0.17  |
|   | INSR rs3745551   | 1.06                      | 1.70               | - | 8.31    | 0.87                                 | 2.24               | 2.32 | -       | 381.84               | 0.11  |
|   | IGF1R rs3743259  | 0.35                      | 1.16               | - | 2.33    | 0.02                                 | 0.79               | 1.40 | -       | 6.40                 | 0.59  |
|   | IGF1R rs2684787  | 1.48                      | 2.10               | - | 19.63   | 0.27                                 | 0.76               | 1.37 | -       | 6.22                 | 0.54  |
|   | IGF1R rs2654981  | 1.13                      | 1.81               | - | 8.55    | 0.71                                 | 0.73               | 1.39 | -       | 5.07                 | 0.44  |
|   | IGF1R rs2654980  | 1.49                      | 2.10               | - | 19.78   | 0.26                                 | 0.72               | 1.35 | -       | 5.55                 | 0.45  |
|   | IGF1R rs2684788  | 1.29                      | 1.96               | - | 11.95   | 0.44                                 | 0.79               | 1.43 | -       | 5.70                 | 0.55  |
|   | IGF1R rs3743249  | 0.94                      | 1.53               | - | 7.78    | 0.87                                 | 0.79               | 1.38 | -       | 7.12                 | 0.62  |
|   | IGF1R rs45484096 | 1.31                      | 1.99               | - | 12.20   | 0.41                                 | 0.80               | 1.43 | -       | 5.99                 | 0.58  |
|   | INSR rs3833238   | 1.32                      | 1.86               | - | 16.64   | 0.47                                 | 2.10               | 2.33 | -       | 179.83               | 0.11  |
|   | INSR rs1051690   | 0.38                      | 1.16               | - | 2.59    | 0.039                                | 1.43               | 1.59 | -       | 84.44                | 0.534 |
|   | INSR rs1799817   | 0.83                      | 1.39               | - | 8.28    | 0.70                                 | 2.63               | 2.23 | -       | 5585.90              | 0.11  |
|   | INSR rs2252673   | 0.82                      | 1.36               | - | 8.92    | 0.69                                 | 2.21               | 1.72 | -       | 7871.47              | 0.27  |
|   | IGF1R rs3743258  | 0.36                      | 1.15               | - | 2.45    | 0.03                                 | 0.81               | 1.41 | -       | 6.65                 | 0.63  |
| B | PP               | Miller & Payne 1-3 vs 4-5 |                    |   |         | Radiological response CR/PR vs SD/PD |                    |      |         |                      |       |
|   | SNVs             | OR                        | 95% CI lower-upper |   | p-value | OR                                   | 95% CI lower-upper |      | p-value |                      |       |
|   | IGF1R rs2016347  | 1.18                      | 1.65               | - | 16.30   | 0.70                                 | 0.55               | 1.19 | -       | 5.40                 | 0.29  |
|   | IGF1R rs2229765  | 1.09                      | 1.57               | - | 13.83   | 0.85                                 | 0.76               | 1.27 | -       | 11.20                | 0.65  |
|   | IGF1R rs1815009  | 2.04                      | 2.03               | - | 355.06  | 0.19                                 | 0.54               | 1.18 | -       | 5.62                 | 0.30  |
|   | INSR rs1051651   | 0.86                      | 1.41               | - | 8.94    | 0.76                                 | 1.77               | 1.70 | -       | 362.78               | 0.35  |
|   | INSR rs3745551   | 2.11                      | 2.31               | - | 199.45  | 0.11                                 | 2.31               | 2.01 | -       | 2135.46              | 0.17  |
|   | IGF1R rs3743259  | 0.59                      | 1.26               | - | 4.50    | 0.27                                 | 1.13               | 1.48 | -       | 25.74                | 0.83  |
|   | IGF1R rs2684787  | 1.74                      | 2.00               | - | 77.48   | 0.24                                 | 0.36               | 1.11 | -       | 3.68                 | 0.12  |
|   | IGF1R rs2654981  | 0.92                      | 1.46               | - | 9.23    | 0.85                                 | 0.68               | 1.25 | -       | 7.83                 | 0.49  |
|   | IGF1R rs2654980  | 1.75                      | 2.01               | - | 79.56   | 0.23                                 | 0.33               | 1.10 | -       | 3.29                 | 0.09  |
|   | IGF1R rs2684788  | 1.05                      | 1.57               | - | 11.61   | 0.90                                 | 0.64               | 1.24 | -       | 6.66                 | 0.42  |
|   | IGF1R rs3743249  | 0.61                      | 1.25               | - | 5.23    | 0.33                                 | 1.45               | 1.62 | -       | 81.21                | 0.51  |
|   | IGF1R rs45484096 | 1.50                      | 1.93               | - | 30.95   | 0.33                                 | 0.50               | 1.18 | -       | 4.71                 | 0.23  |
|   | INSR rs3833238   | 0.87                      | 1.41               | - | 9.07    | 0.78                                 | 1.85               | 1.69 | -       | 669.22               | 0.34  |
|   | INSR rs1051690   | 0.25                      | 1.07               | - | 2.44    | 0.033                                | 1.51               | 1.40 | -       | 825.77               | 0.588 |
|   | INSR rs1799817   | 0.33                      | 1.07               | - | 4.60    | 0.16                                 | 2.10               | 1.47 | -       | 9.46*10 <sup>4</sup> | 0.39  |
|   | INSR rs2252673   | 1.33                      | 1.50               | - | 76.88   | 0.64                                 | 2.17               | 1.45 | -       | 3,59*10 <sup>5</sup> | 0.39  |
|   | IGF1R rs3743258  | 0.64                      | 1.28               | - | 5.17    | 0.35                                 | 1.17               | 1.50 | -       | 29.53                | 0.77  |

**A** Intention-to-treat logistic regression analysis of IGF1R and INSR SNVs with clinical responders and non-responders. **B** Per-protocol logistic regression analysis of IGF1R and INSR SNVs with clinical responders and non-responders.

Cut off value Bonferroni correction for multiple testing is 0.05/17 = 0.0029

OR odds ratio, CI confidence interval, SNV single nucleotide variant, INSR insulin receptor, IGF1R insulin like growth factor 1 receptor. CR complete response. PR partial response. SD stable disease. PD progression of disease.

**Table S7.** Generalized linear model SNVs and treatment interaction

| A ITT Interaction FMD and SNV |      |                    |   |         |       |                       |                    |   |         |       |
|-------------------------------|------|--------------------|---|---------|-------|-----------------------|--------------------|---|---------|-------|
|                               |      | Miller & Payne     |   |         |       | Radiological response |                    |   |         |       |
| SNVs                          | OR   | 95% CI lower-upper |   | p-value |       | OR                    | 95% CI lower-upper |   | p-value |       |
| IGF1R rs2016347               | 1.31 | 0.47               | - | 3.68    | 0.61  | 1.67                  | 0.45               | - | 6.10    | 0.44  |
| IGF1R rs2229765               | 1.03 | 0.34               | - | 3.13    | 0.95  | 1.43                  | 0.36               | - | 5.63    | 0.61  |
| IGF1R rs1815009               | 0.98 | 0.29               | - | 3.23    | 0.97  | 3.72                  | 0.78               | - | 17.70   | 0.10  |
| INSR rs1051651                | 1.01 | 0.31               | - | 3.25    | 0.99  | 1.22                  | 0.26               | - | 5.83    | 0.80  |
| INSR rs3745551                | 0.68 | 0.25               | - | 1.87    | 0.45  | 0.38                  | 0.10               | - | 1.50    | 0.17  |
| IGF1R rs3743259               | 0.48 | 0.17               | - | 1.40    | 0.18  | 1.15                  | 0.31               | - | 4.31    | 0.83  |
| IGF1R rs2684787               | 2.14 | 0.65               | - | 7.05    | 0.21  | 5.13                  | 1.12               | - | 23.63   | 0.036 |
| IGF1R rs2654981               | 2.03 | 0.74               | - | 5.55    | 0.17  | 1.28                  | 0.35               | - | 4.63    | 0.71  |
| IGF1R rs2654980               | 2.02 | 0.62               | - | 6.61    | 0.25  | 5.71                  | 1.26               | - | 25.85   | 0.024 |
| IGF1R rs2684788               | 1.91 | 0.69               | - | 5.30    | 0.21  | 1.48                  | 0.42               | - | 5.27    | 0.54  |
| IGF1R rs3743249               | 0.95 | 0.30               | - | 2.97    | 0.93  | 0.49                  | 0.12               | - | 2.03    | 0.32  |
| IGF1R rs45484096              | 1.58 | 0.55               | - | 4.50    | 0.39  | 2.35                  | 0.59               | - | 9.31    | 0.22  |
| INSR rs3833238                | 0.98 | 0.31               | - | 3.09    | 0.97  | 1.76                  | 0.36               | - | 8.67    | 0.49  |
| INSR rs1051690                | 0.89 | 0.22               | - | 3.59    | 0.872 | 0.27                  | 0.04               | - | 1.76    | 0.172 |
| INSR rs1799817                | 1.33 | 0.34               | - | 5.27    | 0.68  | 0.75                  | 0.09               | - | 6.20    | 0.79  |
| INSR rs2252673                | 0.26 | 0.05               | - | 1.30    | 0.10  | 3.13                  | 0.40               | - | 24.70   | 0.28  |
| IGF1R rs3743258               | 0.44 | 0.15               | - | 1.34    | 0.15  | 1.22                  | 0.33               | - | 4.56    | 0.77  |

| B PP Interaction FMD and SNV |      |                    |   |         |       |                       |                    |   |         |       |
|------------------------------|------|--------------------|---|---------|-------|-----------------------|--------------------|---|---------|-------|
|                              |      | Miller & Payne     |   |         |       | Radiological response |                    |   |         |       |
| SNVs                         | OR   | 95% CI lower-upper |   | p-value |       | OR                    | 95% CI lower-upper |   | p-value |       |
| IGF1R rs2016347              | 1.50 | 0.40               | - | 5.64    | 0.55  | 2.34                  | 0.44               | - | 12.42   | 0.32  |
| IGF1R rs2229765              | 2.21 | 0.58               | - | 8.52    | 0.25  | 1.54                  | 0.29               | - | 7.99    | 0.61  |
| IGF1R rs1815009              | 2.13 | 0.44               | - | 10.37   | 0.35  | 1.24                  | 0.19               | - | 8.00    | 0.82  |
| INSR rs1051651               | 0.45 | 0.11               | - | 1.78    | 0.25  | 1.34                  | 0.24               | - | 7.33    | 0.74  |
| INSR rs3745551               | 1.72 | 0.49               | - | 6.03    | 0.40  | 0.21                  | 0.04               | - | 1.06    | 0.06  |
| IGF1R rs3743259              | 0.42 | 0.09               | - | 2.02    | 0.28  | 1.72                  | 0.34               | - | 8.65    | 0.51  |
| IGF1R rs2684787              | 4.21 | 0.98               | - | 18.02   | 0.05  | 2.86                  | 0.45               | - | 18.32   | 0.27  |
| IGF1R rs2654981              | 2.22 | 0.61               | - | 8.11    | 0.23  | 1.71                  | 0.34               | - | 8.54    | 0.51  |
| IGF1R rs2654980              | 3.95 | 0.93               | - | 16.88   | 0.06  | 2.98                  | 0.47               | - | 19.02   | 0.25  |
| IGF1R rs2684788              | 2.20 | 0.61               | - | 7.98    | 0.23  | 1.82                  | 0.38               | - | 8.70    | 0.45  |
| IGF1R rs3743249              | 0.38 | 0.08               | - | 1.83    | 0.23  | 1.17                  | 0.19               | - | 7.23    | 0.86  |
| IGF1R rs45484096             | 2.81 | 0.75               | - | 10.54   | 0.12  | 1.72                  | 0.33               | - | 8.91    | 0.52  |
| INSR rs3833238               | 0.53 | 0.13               | - | 2.13    | 0.37  | 1.48                  | 0.26               | - | 8.45    | 0.66  |
| INSR rs1051690               | 0.34 | 0.04               | - | 2.66    | 0.302 | 0.27                  | 0.02               | - | 3.31    | 0.309 |
| INSR rs1799817               | 0.55 | 0.09               | - | 3.41    | 0.52  | 0.64                  | 0.06               | - | 7.44    | 0.72  |
| INSR rs2252673               | 0.41 | 0.06               | - | 2.90    | 0.37  | 4.47                  | 0.45               | - | 44.37   | 0.20  |
| IGF1R rs3743258              | 0.30 | 0.05               | - | 1.74    | 0.18  | 1.52                  | 0.29               | - | 7.94    | 0.62  |

**A** Intention-to-treat GLM model **B** Per-protocol GLM model

Cut off value Bonferroni correction for multiple testing is 0.05/17 =0.0029

GLM generalized linear model, ITT intention-to-treat, PP per protocol, OR odds ratio, CI confidence interval, SNV single nucleotide variant, INSR insulin receptor gene, IGF1R insulin like growth factor 1 receptor. CR complete response. PR partial response. SD stable disease. PD progression of disease.

**Table S8.** Generalized linear model SNVs and treatment interaction responders versus non-responders

| <b>A ITT Interaction FMD and SNV</b> |                           |                    |   |       |         |                                      |                    |   |          |         |
|--------------------------------------|---------------------------|--------------------|---|-------|---------|--------------------------------------|--------------------|---|----------|---------|
| SNVs                                 | Miller & Payne 1-3 vs 4-5 |                    |   |       |         | Radiological response CR/PR vs SD/PD |                    |   |          |         |
|                                      | OR                        | 95% CI lower-upper |   |       | p-value | OR                                   | 95% CI lower-upper |   |          | p-value |
| IGF1R rs2016347                      | 1.24                      | 0.31               | - | 4.97  | 0.76    | 0.85                                 | 0.16               | - | 4.59     | 0.85    |
| IGF1R rs2229765                      | 1.39                      | 0.31               | - | 6.21  | 0.66    | 1.16                                 | 0.21               | - | 6.35     | 0.87    |
| IGF1R rs1815009                      | 1.12                      | 0.21               | - | 6.09  | 0.89    | 10.28                                | 1.08               | - | 98.03    | 0.043   |
| INSR rs1051651                       | 0.43                      | 0.08               | - | 2.24  | 0.32    | 1.22                                 | 0.19               | - | 7.69     | 0.83    |
| INSR rs3745551                       | 0.99                      | 0.24               | - | 4.19  | 0.99    | 1.33                                 | 0.19               | - | 9.08     | 0.77    |
| IGF1R rs3743259                      | 0.26                      | 0.04               | - | 1.50  | 0.13    | 0.54                                 | 0.09               | - | 3.07     | 0.48    |
| IGF1R rs2684787                      | 1.94                      | 0.42               | - | 8.94  | 0.39    | 3.22                                 | 0.51               | - | 20.15    | 0.21    |
| IGF1R rs2654981                      | 1.68                      | 0.40               | - | 7.02  | 0.48    | 0.66                                 | 0.13               | - | 3.29     | 0.61    |
| IGF1R rs2654980                      | 1.93                      | 0.42               | - | 8.88  | 0.40    | 3.62                                 | 0.58               | - | 22.63    | 0.17    |
| IGF1R rs2684788                      | 1.97                      | 0.49               | - | 8.01  | 0.34    | 0.96                                 | 0.19               | - | 4.69     | 0.96    |
| IGF1R rs3743249                      | 0.92                      | 0.20               | - | 4.31  | 0.92    | 0.16                                 | 0.02               | - | 1.41     | 0.10    |
| IGF1R rs45484096                     | 1.28                      | 0.32               | - | 5.04  | 0.73    | 2.00                                 | 0.36               | - | 11.15    | 0.43    |
| INSR rs3833238                       | 0.38                      | 0.08               | - | 1.85  | 0.23    | 1.94                                 | 0.27               | - | 13.93    | 0.51    |
| INSR rs1051690                       | 1.52                      | 0.23               | - | 10.09 | 0.665   | 0.40                                 | 0.05               | - | 3.52     | 0.409   |
| INSR rs1799817                       | 2.78                      | 0.23               | - | 33.69 | 0.42    | 1.37                                 | 0.11               | - | 16.66    | 0.80    |
| INSR rs2252673                       | 0.17                      | 0.02               | - | 1.63  | 0.12    | 1.36                                 | 0.07               | - | 27.61    | 0.84    |
| IGF1R rs3743258                      | 0.21                      | 0.03               | - | 1.30  | 0.09    | 0.63                                 | 0.11               | - | 3.51     | 0.60    |
| <b>B PP Interaction FMD and SNV</b>  |                           |                    |   |       |         |                                      |                    |   |          |         |
| SNVs                                 | Miller & Payne            |                    |   |       |         | Radiological response                |                    |   |          |         |
|                                      | OR                        | 95% CI lower-upper |   |       | p-value | OR                                   | 95% CI lower-upper |   |          | p-value |
| IGF1R rs2016347                      | 0.94                      | 0.17               | - | 5.28  | 0.94    | 0.69                                 | 0.05               | - | 9.52     | 0.78    |
| IGF1R rs2229765                      | 1.92                      | 0.32               | - | 11.63 | 0.48    | 1.20                                 | 0.09               | - | 16.14    | 0.89    |
| IGF1R rs1815009                      | 1.59                      | 0.44               | - | 53.58 | 0.79    | 4.36                                 | 0.25               | - | 75.78    | 0.31    |
| INSR rs1051651                       | 0.07                      | 0.01               | - | 0.70  | 0.024   | 0.88                                 | 0.08               | - | 9.99     | 0.92    |
| INSR rs3745551                       | 5.24                      | 0.73               | - | 37.80 | 0.10    | 0.99                                 | 0.07               | - | 14.06    | 0.99    |
| IGF1R rs3743259                      | 0.77                      | 0.10               | - | 5.80  | 0.80    | 1.50                                 | 0.13               | - | 16.89    | 0.74    |
| IGF1R rs2684787                      | 4.51                      | 0.52               | - | 39.39 | 0.17    | 1.49                                 | 0.08               | - | 27.82    | 0.79    |
| IGF1R rs2654981                      | 1.44                      | 0.24               | - | 8.58  | 0.69    | 0.66                                 | 0.06               | - | 7.82     | 0.74    |
| IGF1R rs2654980                      | 4.50                      | 0.51               | - | 39.38 | 0.17    | 1.58                                 | 0.08               | - | 30.05    | 0.76    |
| IGF1R rs2684788                      | 1.55                      | 0.29               | - | 8.29  | 0.61    | 0.67                                 | 0.06               | - | 8.01     | 0.75    |
| IGF1R rs3743249                      | 0.16                      | 0.01               | - | 1.76  | 0.13    | 0.31                                 | 0.02               | - | 5.45     | 0.43    |
| IGF1R rs45484096                     | 1.92                      | 0.33               | - | 11.01 | 0.47    | 0.93                                 | 0.05               | - | 15.69    | 0.96    |
| INSR rs3833238                       | 0.07                      | 0.01               | - | 0.69  | 0.023   | 0.81                                 | 0.06               | - | 10.06    | 0.87    |
| INSR rs1051690                       | 0.48                      | 0.03               | - | 9.16  | 0.629   | 0.08                                 | 0.00               | - | 3.44     | 0.185   |
| INSR rs1799817                       | 0.50                      | 0.02               | - | 11.46 | 0.66    | 0.50                                 | 0.02               | - | 14.74    | 0.69    |
| INSR rs2252673                       | 0.40                      | 0.03               | - | 4.89  | 0.47    | 1.35*10 <sup>9</sup>                 | 0                  | - | infinity | 1.00    |
| IGF1R rs3743258                      | 0.51                      | 0.05               | - | 4.67  | 0.55    | 1.44                                 | 0.13               | - | 16.25    | 0.77    |

**A** Intention-to-treat GLM model    **B** Per-protocol GLM model

Cut off value Bonferroni correction for multiple testing is 0.05/17 =0.0029

GLM generalized linear model, ITT intention-to-treat, PP per protocol, OR odds ratio, CI confidence interval, SNV single nucleotide variant, INSR insulin receptor, IGF1R insulin like growth factor 1 receptor. CR complete response. PR partial response. SD stable disease. PD progression of disease.
